# Supplementary material for: 3D ordered macroporous copper nitride–titanium oxynitride as highly efficient electrocatalysts for universal-pH hydrogen evolution reaction
Source: Royal Society of Chemistry journal article supplement (doi:10.1039/d1ta02457d), 2021-01-01
Supplement: d1ta02457d1.pdf [file d1ta02457d1.pdf]

## Supporting Information

# **3D Ordered Macroporous Copper Nitride-Titanium Oxynitrides as Highly Efficient Electrocatalysts for Universal-pH Hydrogen Evolution Reaction**

Yuchen Wu<sup>1,2</sup>, Fanghua Ning<sup>3</sup>, Zhiwei Wang<sup>1,2</sup>, Ali Saad<sup>2</sup>, Xiuting Li<sup>\*1</sup> and Dingguo Xia<sup>\*3</sup>

<sup>1</sup> *Institute for Advanced Study, Shenzhen University, Shenzhen 518060, China.*

<sup>2</sup> *Key Laboratory of Optoelectronic Devices and Systems, College of Physics and Optoelectronic Engineering, Shenzhen University, Shenzhen 518060, China.*

<sup>3</sup> *Beijing Key Laboratory of Theory and Technology for Advanced Batteries Materials, School of Materials Science and Engineering, Peking University, Beijing 100871, P. R. China.*

\*Correspondence and requests for materials should be addressed to X.L. (email: [xiuting.li@szu.edu.cn](mailto:xiuting.li@szu.edu.cn)) or to D.X. (email: [dgxia@pku.edu.cn](mailto:dgxia@pku.edu.cn)).

## Table of Contents

|                                                                                                                                                                                                               |    |
|---------------------------------------------------------------------------------------------------------------------------------------------------------------------------------------------------------------|----|
| <b>Fig. S1</b> Calibration curve of SCE vs RHE in 0.5M H <sub>2</sub> SO <sub>4</sub> , 1M PBS and 1M KOH electrolyte solution. ....                                                                          | 3  |
| <b>Fig. S2</b> (a)SEM, (b) TEM of Cu <sub>3</sub> N(20)@3DOM-TiO <sub>x</sub> N <sub>y</sub> at low magnitude.....                                                                                            | 4  |
| <b>Fig. S3</b> TEM scanning of Cu <sub>3</sub> N(20)@3DOM-TiO <sub>x</sub> N <sub>y</sub> , a) Electron layered image, b) TEM image, EDS mapping of c) Ti, d) Cu, e) N, f) O, g) C, and i) atomic ratio. .... | 5  |
| <b>Fig. S4</b> N <sub>2</sub> ad/desorption isotherm of bulk-Cu <sub>3</sub> N(20)@TiO <sub>x</sub> N <sub>y</sub> . ....                                                                                     | 6  |
| <b>Fig. S5</b> CV and specific capacitance curve of Cu <sub>3</sub> N(20)@3DOM-TiO <sub>x</sub> N <sub>y</sub> under scan rates from 1 mV s <sup>-1</sup> to 100 mV s <sup>-1</sup> . ....                    | 7  |
| <b>Fig. S6</b> (a) XPS survey, and (b) C1s scan of Cu <sub>3</sub> N(20)@3DOM-TiO <sub>x</sub> N <sub>y</sub> .....                                                                                           | 8  |
| <b>Fig. S7</b> Broken 3DOM porous structure of Cu <sub>3</sub> N(40)@3DOM-TiO <sub>x</sub> N <sub>y</sub> . ....                                                                                              | 9  |
| <b>Fig. S8</b> Water splitting electrolyzer using Cu <sub>3</sub> N(20)@3DOM-TiO <sub>x</sub> N <sub>y</sub> electrocatalyst cathode.....                                                                     | 10 |
| <br>                                                                                                                                                                                                          |    |
| <b>Table S1</b> Ti and Cu ratio obtained from ICP-OES test. ....                                                                                                                                              | 11 |
| <b>Table S2</b> Surface area, pore distribution and pore volume comparison of Cu <sub>3</sub> N(20)@3DOM-TiO <sub>x</sub> N <sub>y</sub> and bulk-Cu <sub>3</sub> N(20)@TiO <sub>x</sub> N <sub>y</sub> ..... | 12 |
| <b>Table S3</b> Surface elemental weight ratio and atomic ratio of the C, N, O, Ti, Cu and Cl. ....                                                                                                           | 13 |
| <b>Table S4</b> HER performance comparison of several up to date related electrocatalysts. ....                                                                                                               | 14 |
| <b>References</b> .....                                                                                                                                                                                       | 15 |

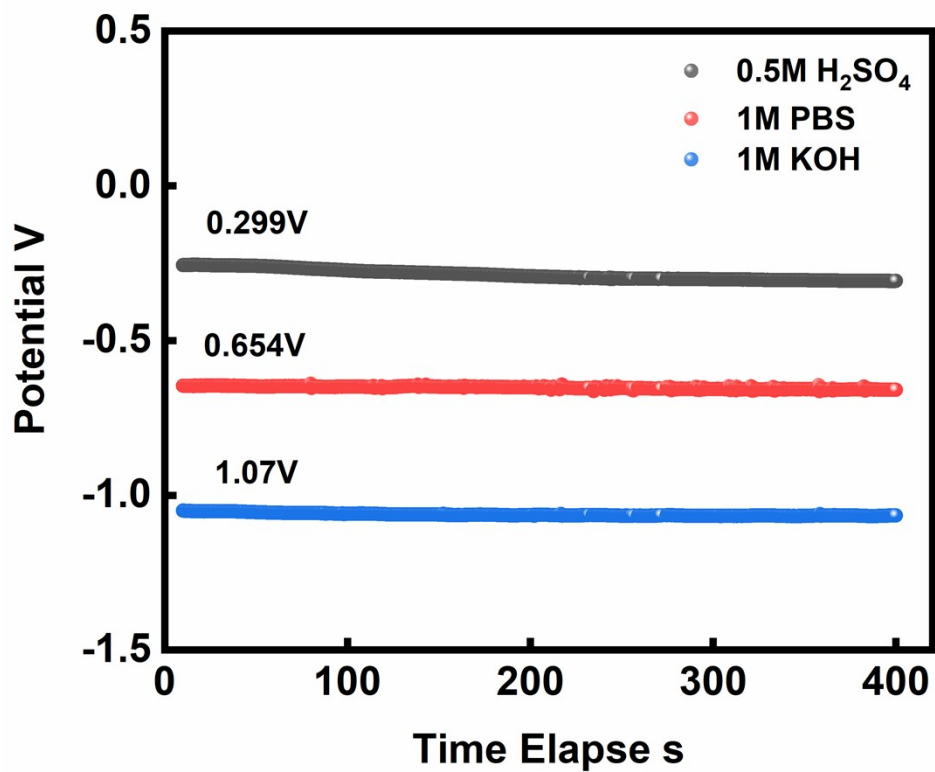

**Fig. S1** Calibration curve of SCE vs RHE in 0.5M H<sub>2</sub>SO<sub>4</sub>, 1M PBS and 1M KOH electrolyte solution.

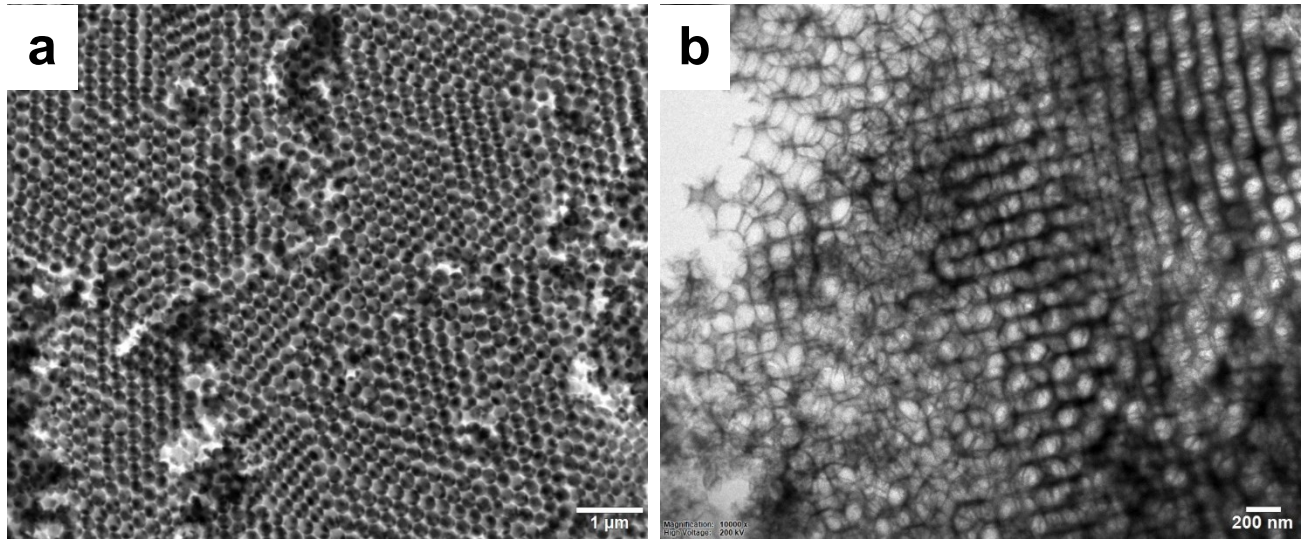

**Fig. S2** (a)SEM, (b) TEM of  $\text{Cu}_3\text{N}(20)\text{@}3\text{DOM-TiO}_x\text{N}_y$  at low magnification.

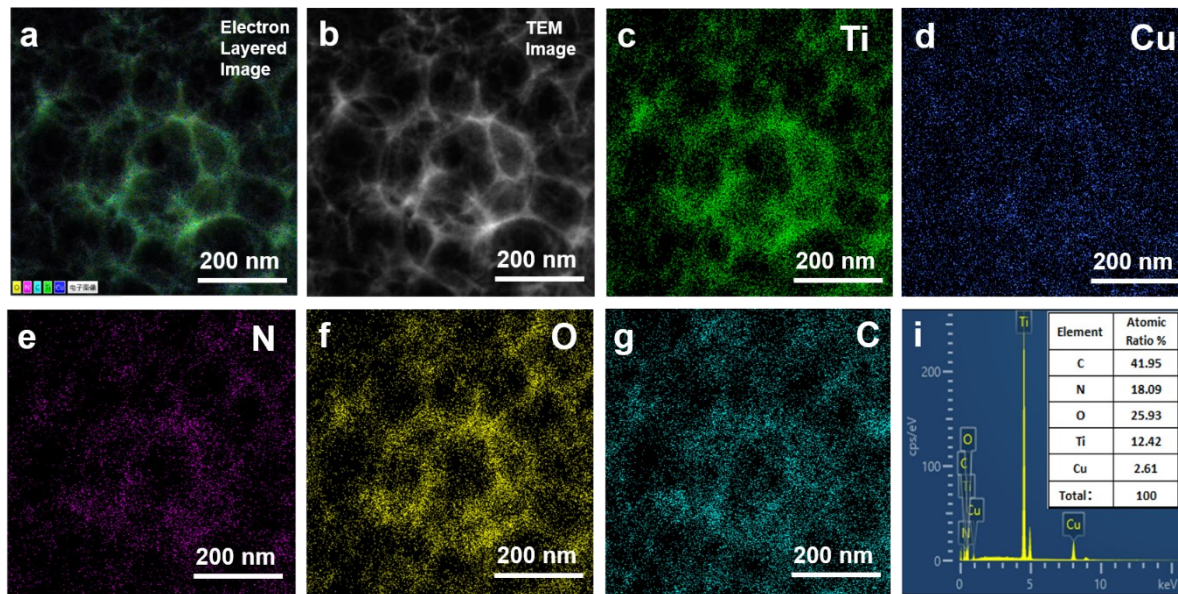

**Fig. S3** TEM scanning of  $\text{Cu}_3\text{N}(20)\text{@}3\text{DOM-TiO}_x\text{N}_y$ , a) Electron layered image, b) TEM image, EDS mapping of c) Ti, d) Cu, e) N, f) O, g) C, and i) atomic ratio.

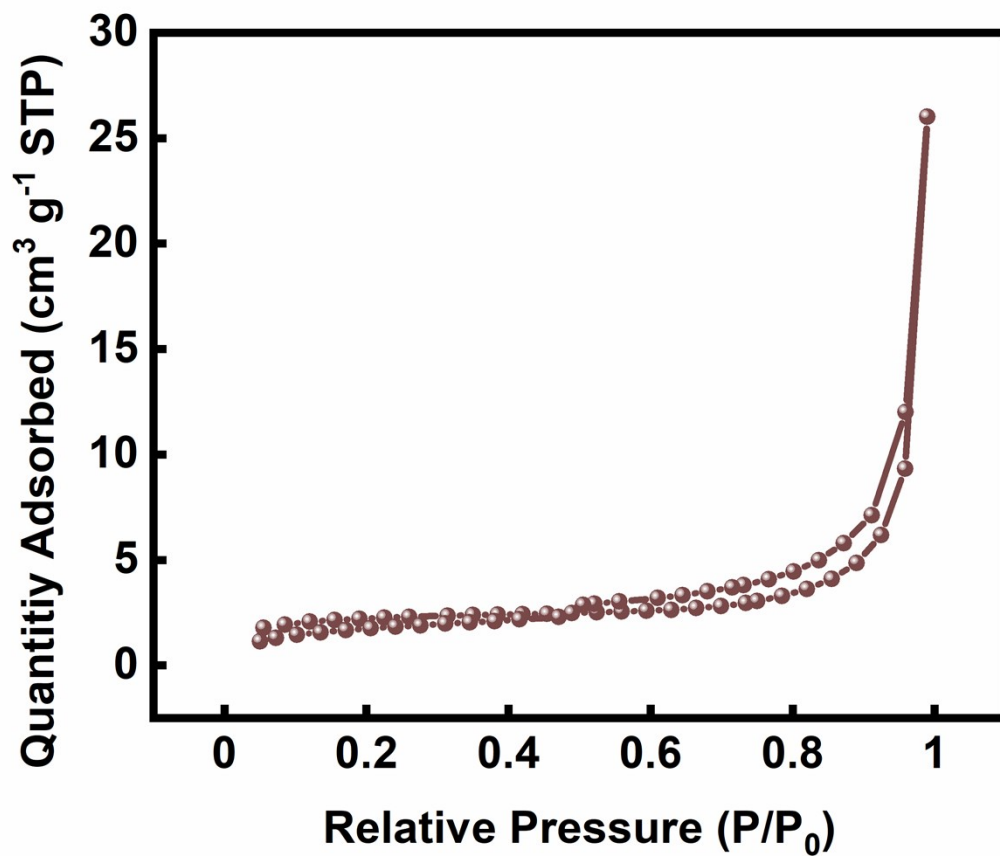

**Fig. S4** N<sub>2</sub> ad/desorption isotherm of bulk-Cu<sub>3</sub>N(20)@TiO<sub>x</sub>N<sub>y</sub>.

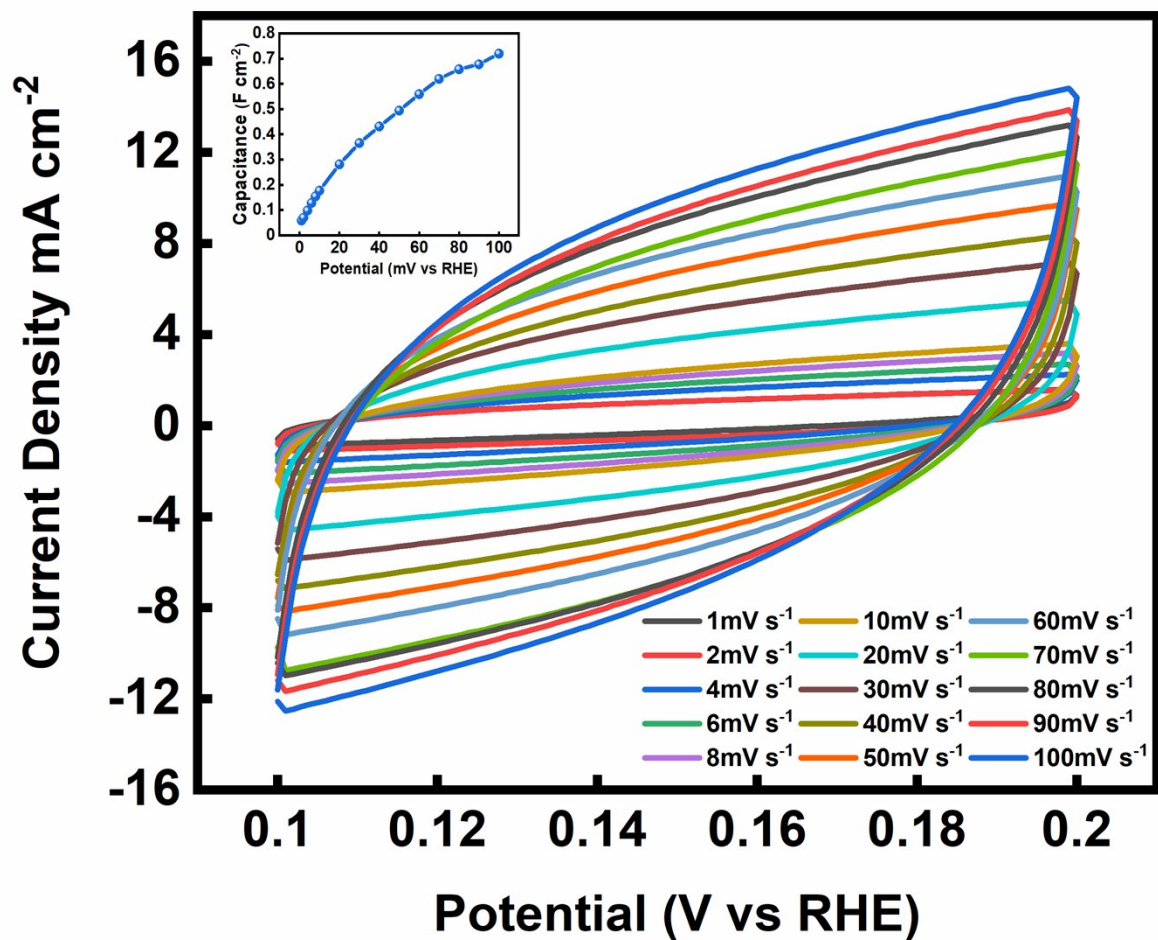

**Fig. S5** CV and specific capacitance curve of Cu<sub>3</sub>N(20)@3DOM-TiO<sub>x</sub>N<sub>y</sub> under scan rates from 1 mV s<sup>-1</sup> to 100 mV s<sup>-1</sup>.

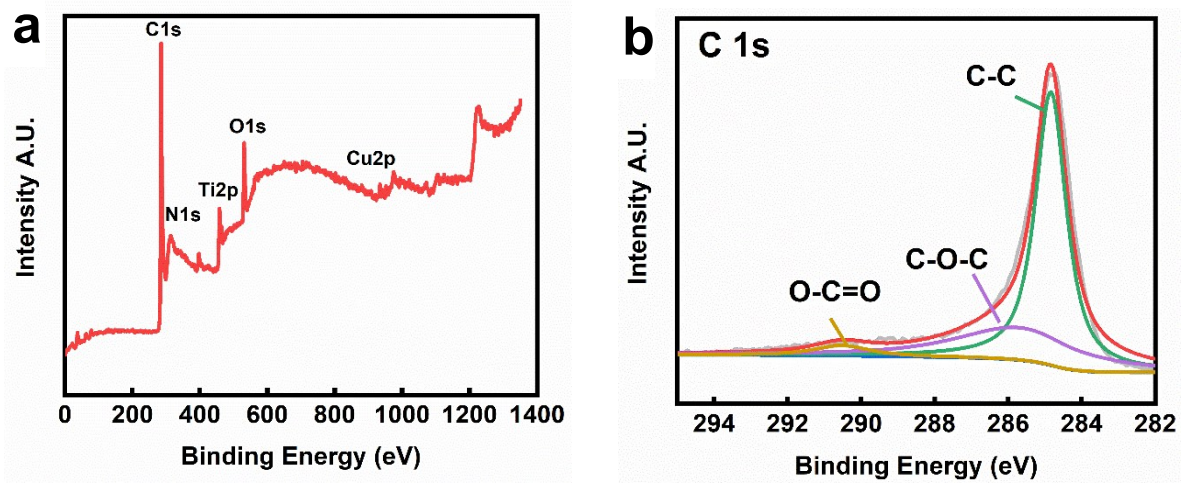

**Fig. S6** (a) XPS survey, and (b) C1s scan of  $\text{Cu}_3\text{N}(20)\text{@}3\text{DOM-TiO}_x\text{N}_y$ .



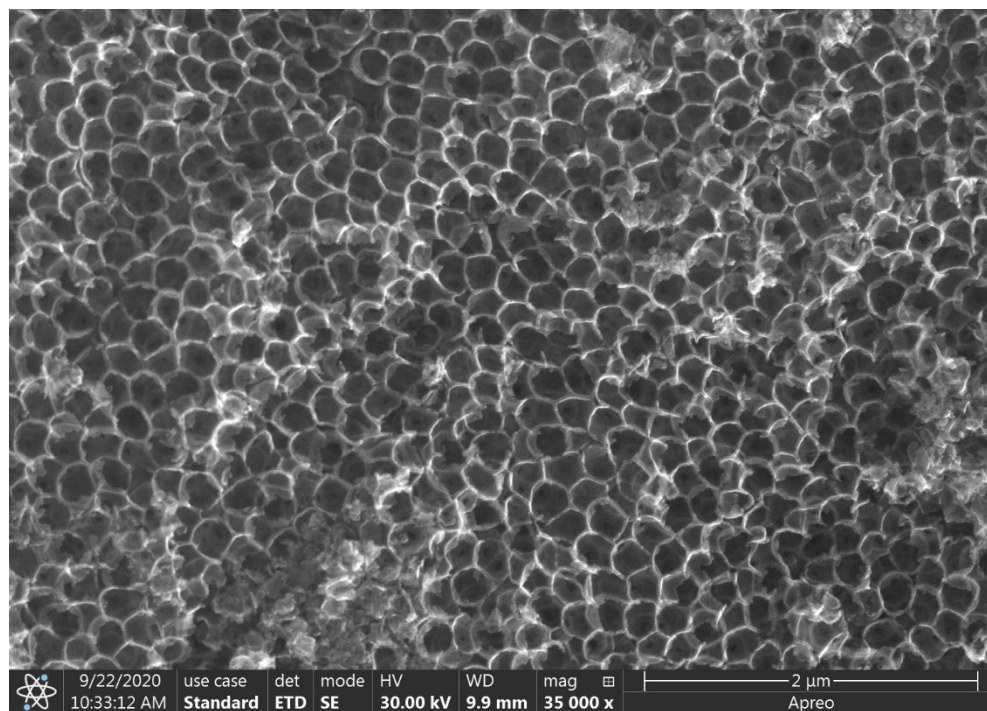

**Fig. S7** Broken 3DOM porous structure of  $\text{Cu}_3\text{N}(40)@3\text{DOM-TiO}_x\text{N}_y$ .

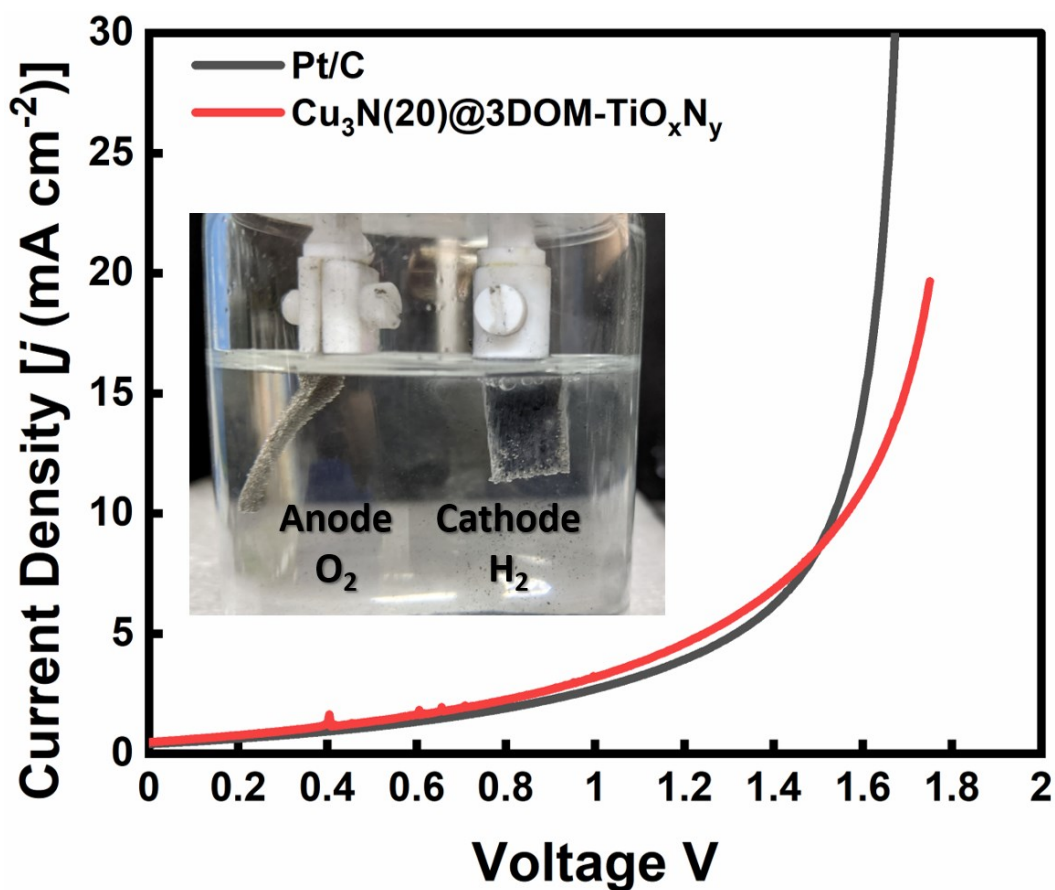

**Fig. S8** Water splitting electrolyzer using  $\text{Cu}_3\text{N}(20)\text{@}3\text{DOM-TiO}_x\text{N}_y$  electrocatalyst cathode.

The  $\text{Cu}_3\text{N}(20)\text{@}3\text{DOM-TiO}_x\text{N}_y$  on nickel foam acted as the cathode and displayed a high performance with a cell voltage of 1.57 V, which is close to the 1.51 V of Pt/C to afford  $10 \text{ mA cm}^{-2}$  water splitting current in 1.0 M PBS with continuous gas evolution on both electrodes in a two-electrode water electrolyzer.

Additionally, a video showing the same two-electrodes electrolyzer driven by a 2V solar-panel generating  $\text{H}_2$  bubbles can be found in the supporting material.

**Table S1** Ti and Cu ratio obtained from ICP-OES test.

| <b>Element</b> | <b>Mass ratio wt (%)</b> | <b>Atomic Percentage (%)</b> |
|----------------|--------------------------|------------------------------|
| <b>Cu</b>      | 13.74                    | 20.8%                        |
| <b>Ti</b>      | 39.40                    | 79.2%                        |

**Table S2** Surface area, pore distribution and pore volume comparison of  $\text{Cu}_3\text{N}(20)@3\text{DOM-TiO}_x\text{N}_y$  and  $\text{bulk-Cu}_3\text{N}(20)@TiO_xN_y$ .

|                                                   | $\text{Cu}_3\text{N}(20)@3\text{DOM-TiO}_x\text{N}_y$ | $\text{Bulk-Cu}_3\text{N}(20)@TiO_xN_y$ |
|---------------------------------------------------|-------------------------------------------------------|-----------------------------------------|
| <b>Surface Area</b><br>$\text{m}_2 \text{g}^{-1}$ | 163.7521                                              | 7.3568                                  |
| <b>Pore Volume</b><br>$\text{cm}^3 \text{g}^{-1}$ | 0.260232                                              | 0.039090                                |
| <b>Pore size</b><br><b>nm</b>                     | 6.3567                                                | 21.25396                                |

**Table S3** Surface elemental weight ratio and atomic ratio of the C, N, O, Ti, Cu and Cl.

| <b>Element</b> | <b>Mass ratio<br/>wt/%</b> |
|----------------|----------------------------|
| <b>Cu</b>      | 11.85                      |
| <b>Ti</b>      | 5.45                       |
| <b>N</b>       | 5.63                       |
| <b>O</b>       | 32.64                      |
| <b>C</b>       | 8.27                       |
| <b>Cl</b>      | <0.1                       |
| <b>Total</b>   | 100.00                     |

**Table S4** HER performance comparison of several up to date related electrocatalysts.

| Electrocatalyst                                        | Electrolyte  | Overpotential<br>mV (@10mA cm <sup>-2</sup> ) | Tafel Slope<br>mV dec <sup>-1</sup> | References |
|--------------------------------------------------------|--------------|-----------------------------------------------|-------------------------------------|------------|
| Pt/C                                                   | Universal pH | 50~55                                         | 42~47                               | This work  |
| Cu <sub>3</sub> N@3DOM-TiO <sub>x</sub> N <sub>y</sub> | Universal pH | 71.1~79.3                                     | 55~63                               | This work  |
| Cu <sub>2</sub> O-Cu <sub>2</sub> Se nanoflake arrays  | Universal pH | 52.9~77.8                                     | 78.7~173.5                          | 1          |
| Cu-doped CoP arrays                                    | Universal pH | 81~137                                        | 102~144                             | 2          |
| Cu(0)-based catalyst                                   | Neutral      | 70                                            | 127                                 | 3          |
| MOF-derived copper nitride/phosphide                   | Neutral      | 109                                           | 69.0~138.3                          | 4          |
| Cu-Ti                                                  | Alkaline     | 108                                           | ~120                                | 5          |
| Mesoporous Cu-Ni                                       | Alkaline     | 140                                           | 79                                  | 6          |
| Holey Ni-Cu sheets                                     | Alkaline     | 100                                           | ~70                                 | 7          |
| NiMo-NiCu                                              | Alkaline     | 154                                           | 42                                  | 8          |
| Co <sub>3</sub> O <sub>4</sub> -CuO                    | Alkaline     | 288                                           | 65                                  | 9          |
| Hierarchical nanoporous Ni(Cu)@NiFeP                   | Alkaline     | 128                                           | 121.8                               | 10         |
| Cu@Cu <sub>2</sub> O@C                                 | Alkaline     | 97                                            | 274~307                             | 11         |
| Cu-Mo-O nanosheets                                     | Alkaline     | 112                                           | 136                                 | 12         |
| Cu-MOF                                                 | Alkaline     | 89.3                                          | 33.4                                | 13         |
| Cu <sub>2</sub> O layer/TiO <sub>2</sub> nanodots      | Alkaline     | 96                                            | 160                                 | 14         |
| Cu-Co <sub>2</sub> P/NCNTs                             | Acidic       | 140                                           | 112                                 | 15         |
| Hollow Cu/Cu <sub>2</sub> O/Cu <sub>2</sub> S          | Acidic       | 86                                            | 107                                 | 16         |
| Cu <sub>3</sub> P-CoP nanowire                         | Acidic       | 59                                            | 96                                  | 17         |
| Cu-MoS <sub>2</sub> /rGO                               | Acidic       | 126                                           | 90                                  | 18         |
| Hemi-core@frame AuCu@IrNi                              | Acidic       | 355                                           | 58                                  | 19         |
| Cu@graphdiyne core-shell nanowires array               | Acidic       | 79                                            | 89                                  | 20         |
| NiMo <sub>6</sub> O <sub>24</sub> @Cu/TNA              | Acidic       | 130                                           | 89.2                                | 21         |

## References

1. Ray C, *et al.* Cu<sub>2</sub>O–Cu<sub>2</sub>Se mixed-phase nanoflake arrays: pH-universal hydrogen evolution reactions with ultralow overpotential. *ChemElectroChem* **6**, 5014-5021 (2019).
2. Wen L, *et al.* Cu-Doped CoP nanorod arrays: efficient and durable hydrogen evolution reaction electrocatalysts at all pH values. *ACS Applied Energy Materials* **1**, 3835-3842 (2018).
3. Liu X, Cui S, Sun Z, Du P. Robust and highly active copper-based electrocatalyst for hydrogen production at low overpotential in neutral water. *Chemical Communications* **51**, 12954-12957 (2015).
4. Wang Q, *et al.* MOF-derived copper nitride/phosphide heterostructure coated by multi-doped carbon as electrocatalyst for efficient water splitting and neutral-pH hydrogen evolution reaction. *ChemElectroChem* **7**, 289-298 (2020).
5. Shinde DV, *et al.* In situ dynamic nanostructuring of the Cu–Ti catalyst-support system promotes hydrogen evolution under alkaline conditions. *ACS Applied Materials & Interfaces* **10**, 29583-29592 (2018).
6. Li Z, *et al.* Mesoporous hollow Cu–Ni alloy nanocage from core–shell Cu@Ni nanocube for efficient hydrogen evolution reaction. *ACS Catalysis* **9**, 5084-5095 (2019).
7. Chu S, *et al.* Holey Ni-Cu phosphide nanosheets as a highly efficient and stable electrocatalyst for hydrogen evolution. *Applied Catalysis B: Environmental* **243**, 537-545 (2019).
8. Santos HLS, Corradini PG, Medina M, Dias JA, Mascaro LH. NiMo–NiCu inexpensive composite with high activity for hydrogen evolution reaction. *ACS Applied Materials & Interfaces* **12**, 17492-17501 (2020).
9. Tahira A, Ibupoto ZH, Willander M, Nur O. Advanced Co<sub>3</sub>O<sub>4</sub>–CuO nano-composite based electrocatalyst for efficient hydrogen evolution reaction in alkaline media. *International Journal of Hydrogen Energy* **44**, 26148-26157 (2019).
10. Sun Q, *et al.* Hierarchical nanoporous Ni(Cu) alloy anchored on amorphous NiFeP as efficient bifunctional electrocatalysts for hydrogen evolution and hydrazine oxidation. *Journal of Catalysis* **373**, 180-189 (2019).
11. Li N, Yan W, Zhang W, Wang Z, Chen J. Photoinduced formation of Cu@Cu<sub>2</sub>O@C plasmonic nanostructures with efficient interfacial charge transfer for hydrogen evolution. *Journal of Materials Chemistry A* **7**, 19324-19331 (2019).
12. Wang A, *et al.* Dynamically controlled growth of Cu–Mo–O nanosheets for efficient electrocatalytic hydrogen evolution. *Journal of Materials Chemistry C* **8**, 9337-9344 (2020).
13. Nivetha R, *et al.* Cu based Metal Organic Framework (Cu-MOF) for electrocatalytic hydrogen evolution reaction. *Materials Research Express* **7**, 114001 (2020).
14. Long B, *et al.* Interface charges redistribution enhanced monolithic etched copper foam-based Cu<sub>2</sub>O layer/TiO<sub>2</sub> nanodots heterojunction with high hydrogen evolution electrocatalytic activity. *Applied Catalysis B: Environmental* **243**, 365-372 (2019).
15. Pan Y, Liu Y, Lin Y, Liu C. Metal doping effect of the M–Co<sub>2</sub>P/Nitrogen-doped carbon nanotubes (M = Fe, Ni, Cu) hydrogen evolution hybrid catalysts. *ACS Applied Materials & Interfaces* **8**, 13890-13901 (2016).

16. Wei Y, He W, Sun P, Yin J, Deng X, Xu X. Synthesis of hollow Cu/Cu<sub>2</sub>O/Cu<sub>2</sub>S nanotubes for enhanced electrocatalytic hydrogen evolution. *Applied Surface Science* **476**, 966-971 (2019).
17. Du H, Zhang X, Tan Q, Kong R, Qu F. A Cu<sub>3</sub>P–CoP hybrid nanowire array: a superior electrocatalyst for acidic hydrogen evolution reactions. *Chemical Communications* **53**, 12012-12015 (2017).
18. Li F, *et al.* Synthesis of Cu–MoS<sub>2</sub>/rGO hybrid as non-noble metal electrocatalysts for the hydrogen evolution reaction. *Journal of Power Sources* **292**, 15-22 (2015).
19. Park J, *et al.* Hemi-core@frame AuCu@IrNi nanocrystals as active and durable bifunctional catalysts for the water splitting reaction in acidic media. *Nanoscale Horizons* **4**, 727-734 (2019).
20. Xue Y, *et al.* Self-catalyzed growth of Cu@graphdiyne core–shell nanowires array for high efficient hydrogen evolution cathode. *Nano Energy* **30**, 858-866 (2016).
21. Zang D, Huang Y, Li Q, Tang Y, Wei Y. Cu dendrites induced by the Anderson-type polyoxometalate NiMo<sub>6</sub>O<sub>24</sub> as a promising electrocatalyst for enhanced hydrogen evolution. *Applied Catalysis B: Environmental* **249**, 163-171 (2019).
